# Supplementary material
Source: Springer Nature journal article supplement (https://www.springermedizin.de/resource/supplementary/12875_2010_572_MOESM1_ESM.pdf/9434940)
Supplement: MOESM1 [file 9434940]

Elderly residents at 32 nursing homes  
n = 1187

Not included (n = 436)  
Away when the study took place n=8  
Substantial incontinence n=291  
Urinary indwelling catheter n=96  
Ongoing dialysis n=1  
Unknown reason n=40

Eligible patients fulfilling inclusion criteria n = 751

Excluded patients (n = 96)  
Refused participation n=96

Conclusive results (n = 651)

Inconclusive results (n = 4)  
Data accidentally lost n=3  
Two urinary cultures were inadvertently  
taken showing different results n=1
